# Supplementary material for: Sustainable Wax Coatings Made from Pine Needle Extraction Waste for Nanopaper Hydrophobization
Source: MDPI journal article supplement (doi:10.3390/membranes12050537), 2022-05-20
Supplement: s1 [file s1]

Supplementary Materials

# Sustainable Wax Coatings Made from Pine Needle Extraction Waste for Nanopaper Hydrophobization

Sergejs Beluns <sup>1,\*</sup>, Oskars Platnieks <sup>1</sup>, Jekaterina Sevchenko <sup>2</sup>, Mara Jure <sup>2</sup>, Gerda Gaidukova <sup>1</sup>, Liga Grase <sup>3</sup> and Sergejs Gaidukovs <sup>1</sup>

<sup>1</sup> Institute of Polymer Materials, Faculty of Materials Science and Applied Chemistry, Riga Technical University, P.Valdena 3/7, LV-1048 Riga, Latvia; oskars.platnieks\_1@rtu.lv (O.P.); gerda.gaidukova@rtu.lv (G.G.); sergejs.gaidukovs@rtu.lv (S.G.)

<sup>2</sup> Institute of Technology of Organic Chemistry, Faculty of Materials Science and Applied Chemistry, Riga Technical University, P.Valdena 3/7, LV-1048 Riga, Latvia; hiacint89@inbox.lv (J.S.); mara.jure@rtu.lv (M.J.)

<sup>3</sup> Institute of Materials and Surface Engineering, Faculty of Materials Science and Applied Chemistry, Riga Technical University, P.Valdena 3, LV-1048 Riga, Latvia; liga.grase@rtu.lv

\* Correspondence: sergejs.beluns@rtu.lv

**Citation:** Beluns, S.; Platnieks, O.; Sevchenko, J.; Jure, M.; Gaidukova, G.; Grase, L.; Gaidukovs, S. Sustainable Wax Coatings Made from Pine Needle Extraction Waste for Nanopaper Hydrophobization. *Membranes* **2022**, *12*, 537. <https://doi.org/10.3390/membranes12050537>

Academic Editors: Cristiana Boi and Sanghyun Jeong

Received: 21 April 2022

Accepted: 18 May 2022

Published: 20 May 2022

**Publisher's Note:** MDPI stays neutral with regard to jurisdictional claims in published maps and institutional affiliations.

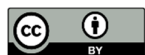

**Copyright:** © 2022 by the authors. Licensee MDPI, Basel, Switzerland. This article is an open access article distributed under the terms and conditions of the Creative Commons Attribution (CC BY) license (<https://creativecommons.org/licenses/by/4.0/>).

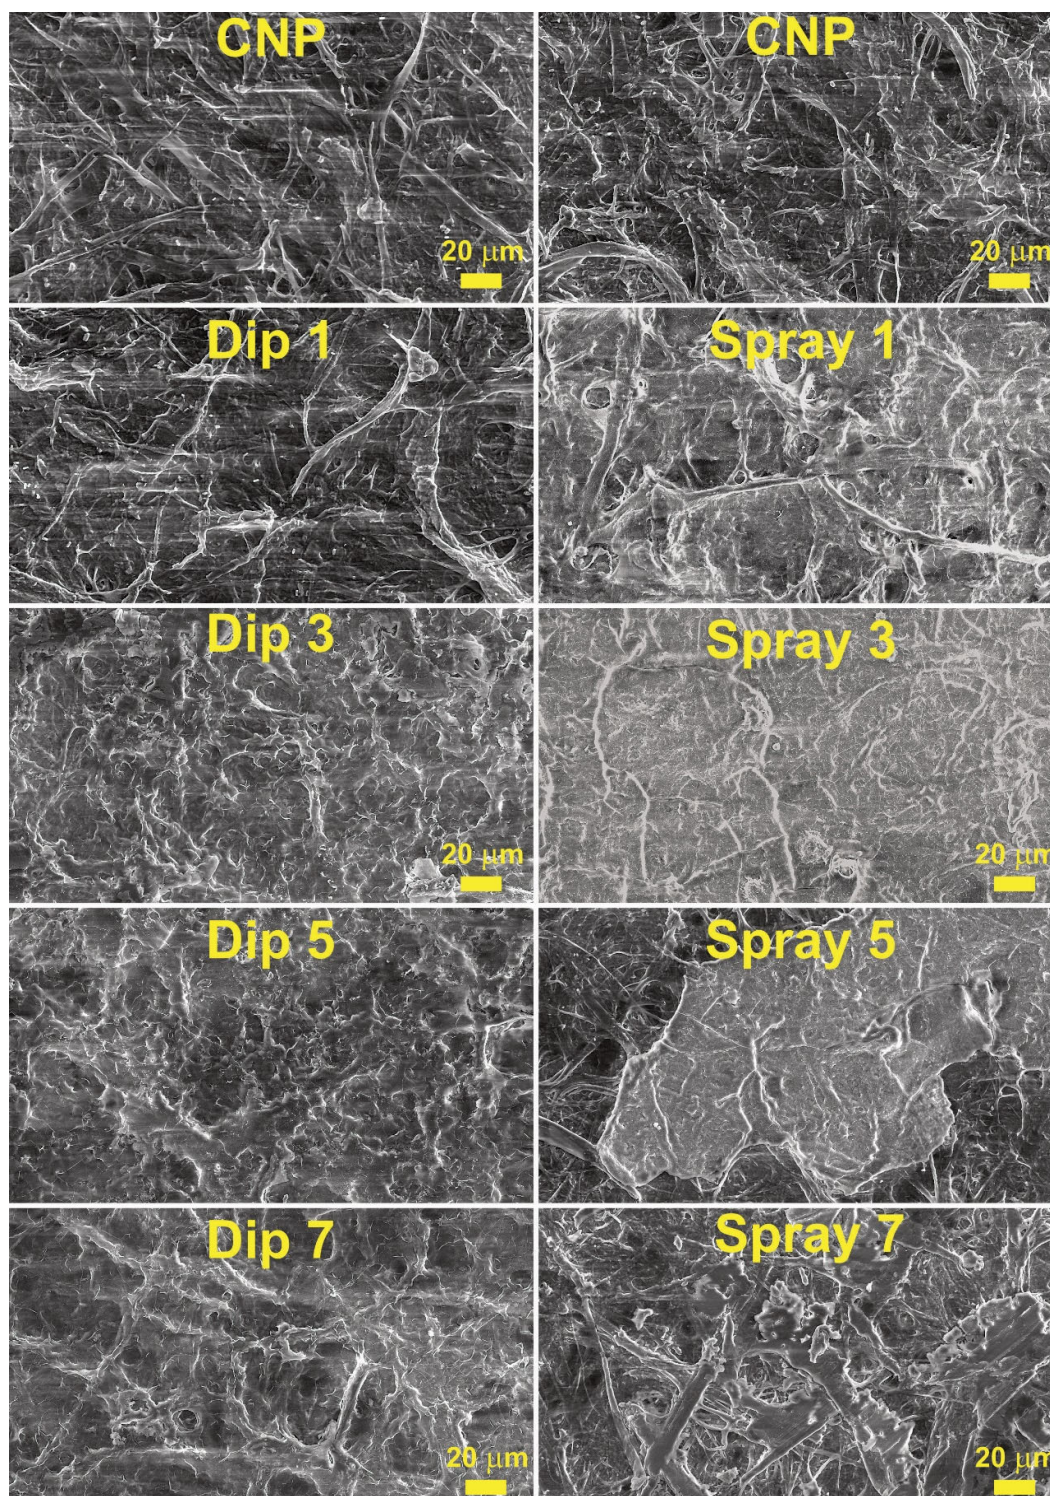

**Figure S1.** Lower magnification SEM micrographs of the CNP surface with 0, 1, 3, 5, and 7 layers of coatings applied by dip or spray method.

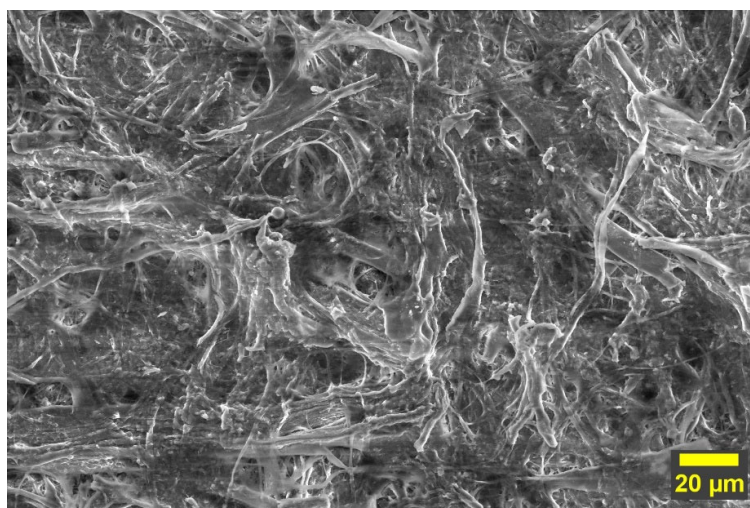

**Figure S2.** Lower magnification SEM micrograph of the MNP surface.
